# Supplementary material for: Enzymatic Conversion of Hydrolysis Lignin—A Potential Biorefinery Approach
Source: MDPI journal article supplement (doi:10.3390/en16010370), 2022-12-28
Supplement: s1 [file s1]

## Supplementary information

# Enzymatic Conversion of Hydrolysis Lignin – A Potential Biorefinery Approach

Sharib Khan <sup>1\*</sup>, Kait Kaarel Puss <sup>2</sup>, Tiit Lukk <sup>3</sup>, Mart Loog <sup>2,4,\*</sup>, Timo Kikas <sup>1</sup> and Siim Salmar <sup>2,5</sup>

<sup>1</sup>Chair of Biosystems Engineering, Institute of Forestry and Engineering, Estonian University of Life Sciences, Friedrich Reinhold Kreutzwaldi 1a, 51014 Tartu, Estonia

<sup>2</sup>The core laboratory for Wood Chemistry and Bioprocessing, University of Tartu, Ravila 14a, 50411, Tartu, Estonia

<sup>3</sup>Laboratory of Lignin Biochemistry, Department of Chemistry and Biotechnology, Tallinn University of Technology, Tallinn, Estonia

<sup>4</sup>Institute of Technology, University of Tartu, Nooruse 1, 50411 Tartu, Estonia;

<sup>5</sup>Institute of Chemistry, University of Tartu, Ravila 14a, 50411, Tartu, Estonia

\* Corresponding author. E-mail address: sharib.khan@emu.ee, mart.loog@ut.ee

## Supplementary figures

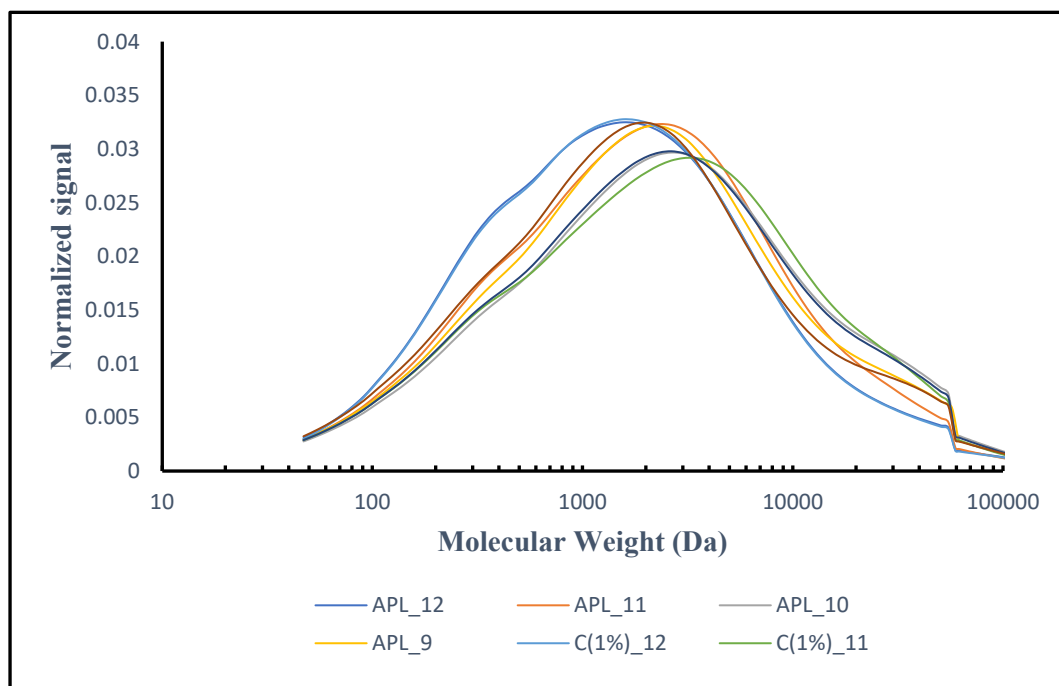

**Figure S1.** Change in APL molecular weights after *AmLac* treatment in 0.1 M NaOH solutions at different pH (9,10,11,12).

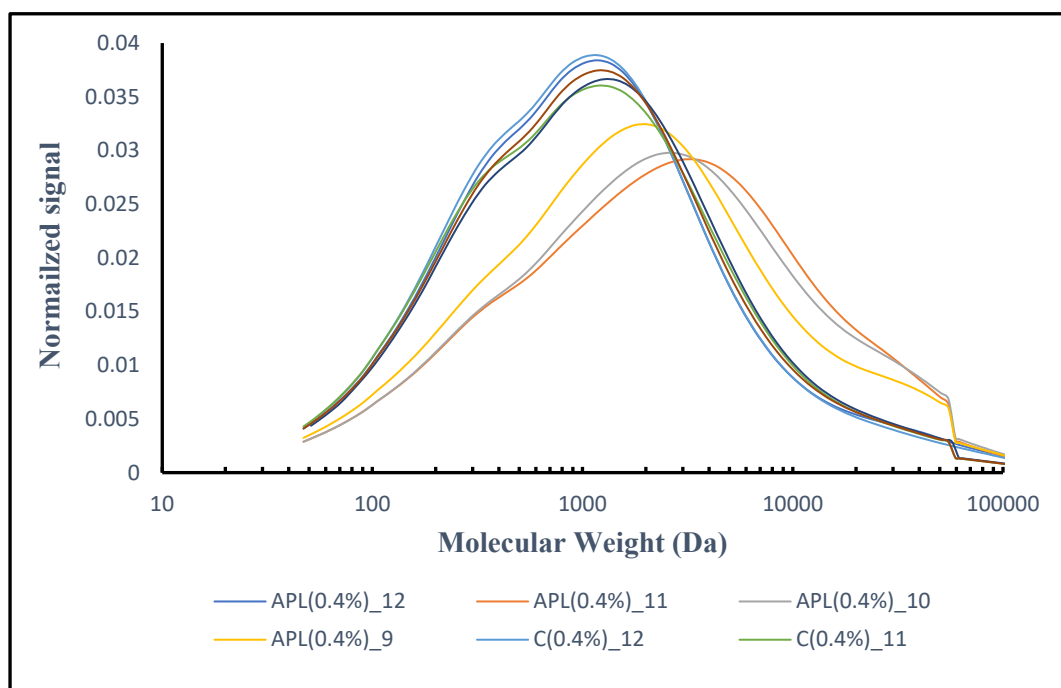

**Figure S2.** Change in APL molecular weights after *SvLac* treatment in 0.1 M NaOH solutions at different pH (9,10,11,12).

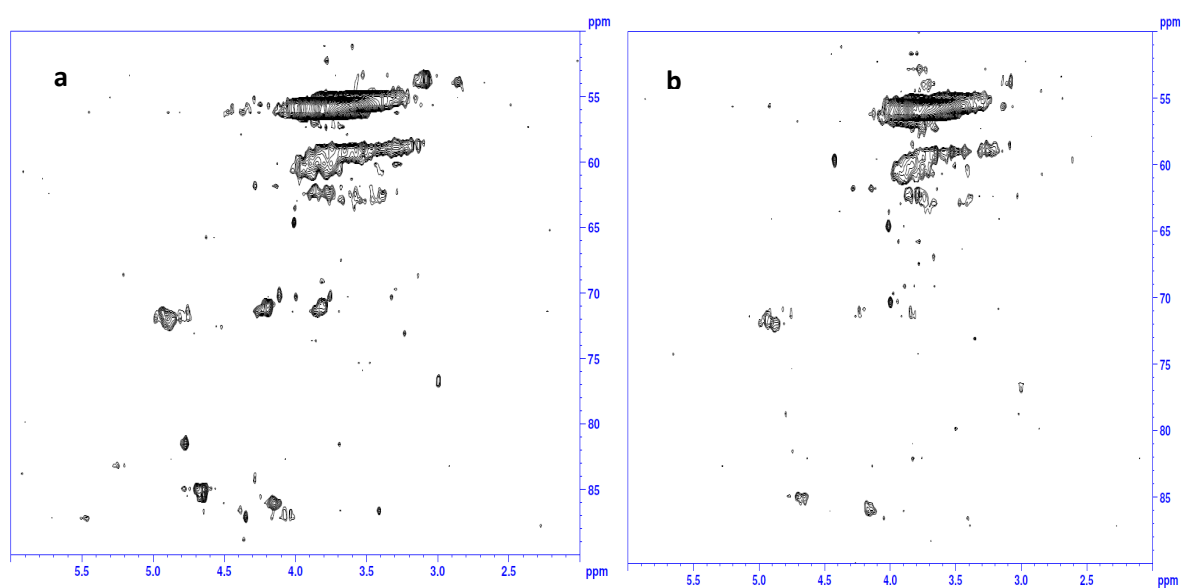

**Figure S3.** Aliphatic region HSQC spectra of APL(a) and *ScLac* treated Apl(b).

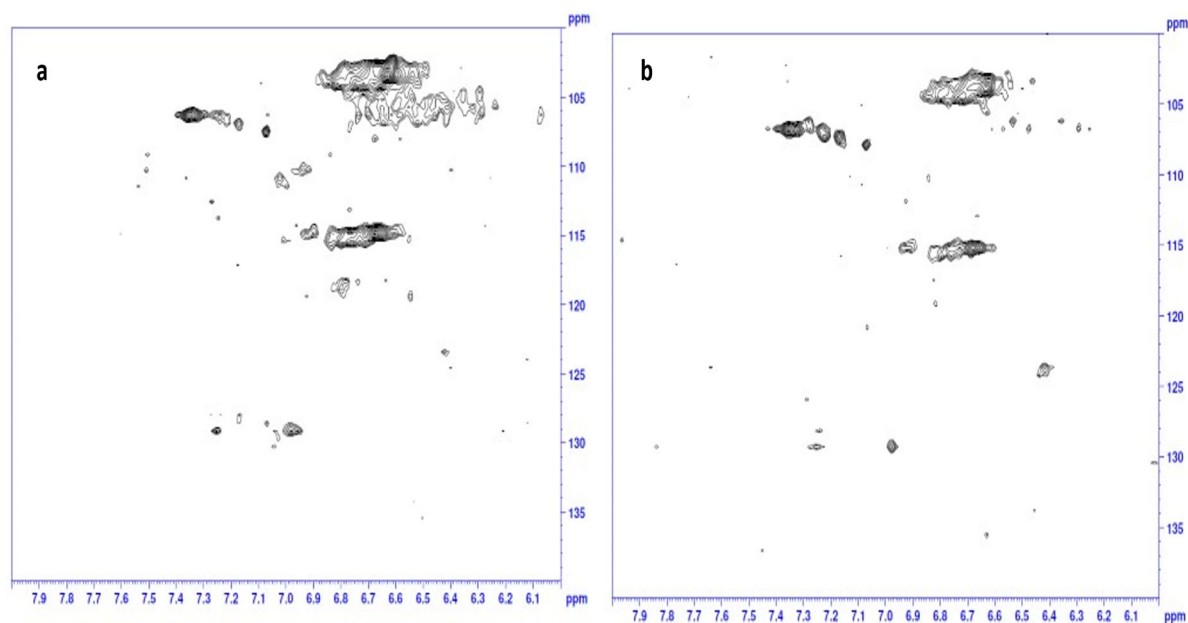

**Figure S4. Aromatic region HSQC spectra of APL(a) and *Sclac* treated Apl(b).**

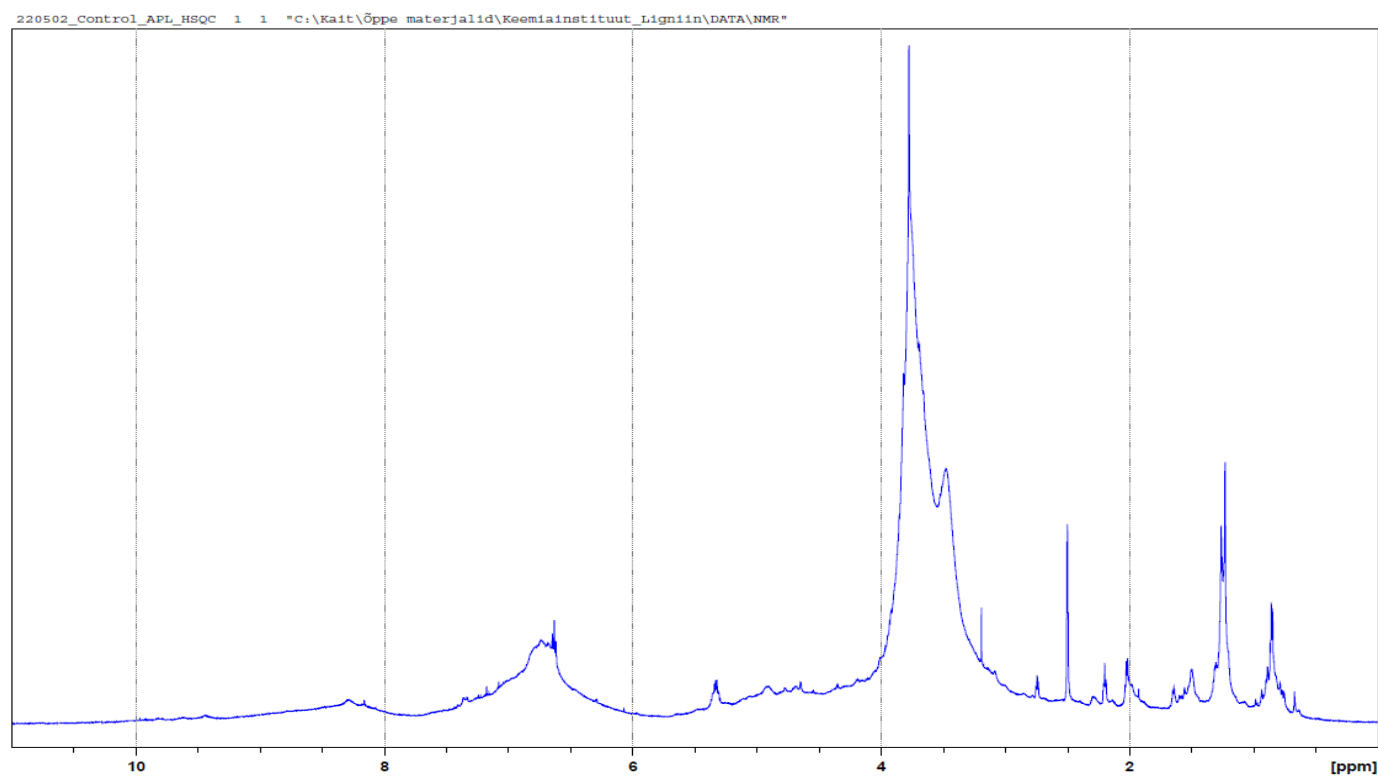

**Figure S5.  $^1\text{H}$  NMR spectra of untreated (control) APL.**

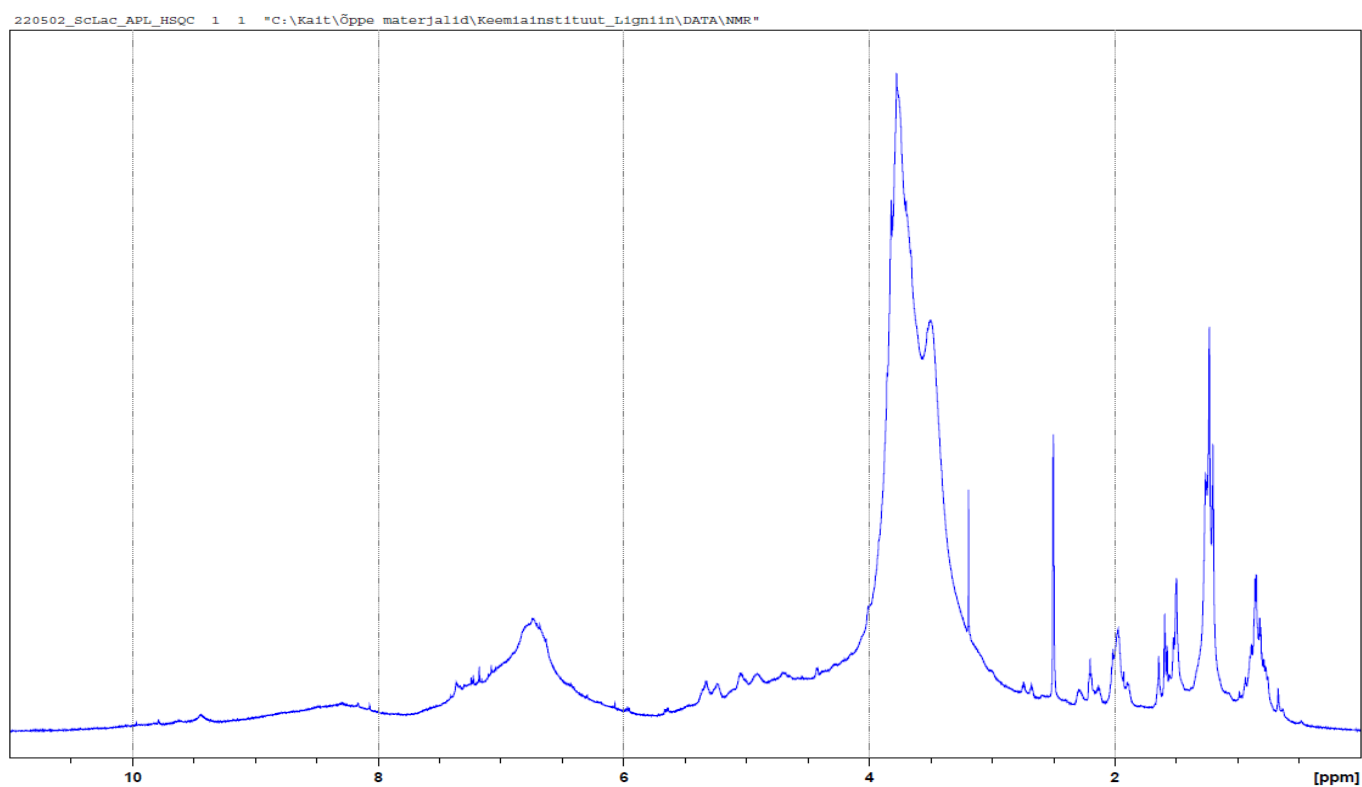

**Figure S6.**  $^1\text{H}$  NMR spectra of *ScLac* treated APL.
